# Supplementary material for: Reactions of phthalazine, quinazoline, 4,7-phenanthroline and 2,3′-bipyridine with ruthenium carbonyl
Source: Royal Society of Chemistry journal article supplement (doi:10.1039/c2dt30583f), 2012-01-01
Supplement: c2dt30583f.pdf [file c2dt30583f.pdf]

**ELECTRONIC SUPPLEMENTARY INFORMATION  
(ESI)**

---

**Reactions of phthalazine, quinazoline, 4,7-phenanthroline and 2,3'-  
bipyridine with ruthenium carbonyl†**

**Javier A. Cabeza\*<sup>a</sup> and Vanessa Pruneda<sup>a</sup>**

<sup>a</sup>*Departamento de Química Orgánica e Inorgánica-IUQOEM, Universidad de Oviedo-CSIC, E-33071 Oviedo, Spain. E-mail: [jac@uniovi.es](mailto:jac@uniovi.es); Fax: +34 985103446*

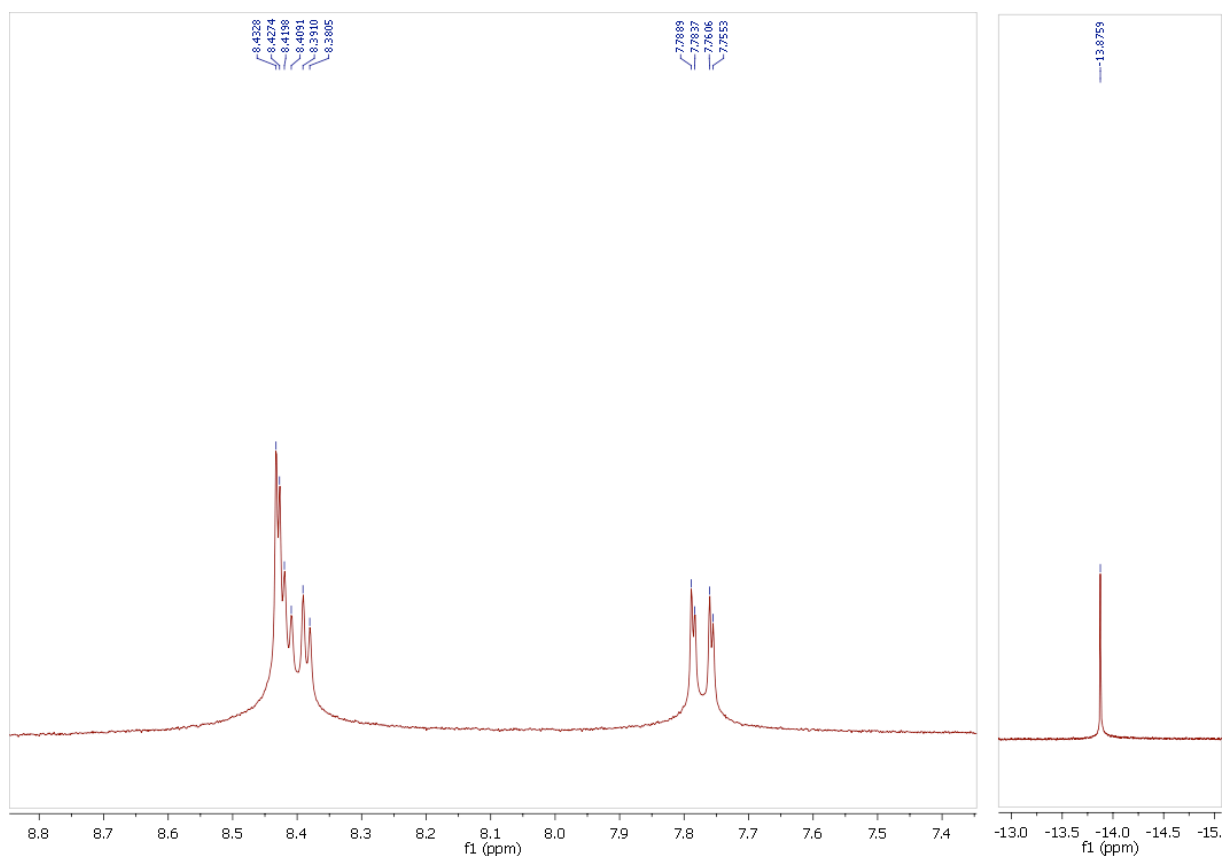

Fig. S1  $^1\text{H}$  NMR spectrum ( $\text{CD}_2\text{Cl}_2$ , 293 K, 300 MHz) of **6a** + **6b**.

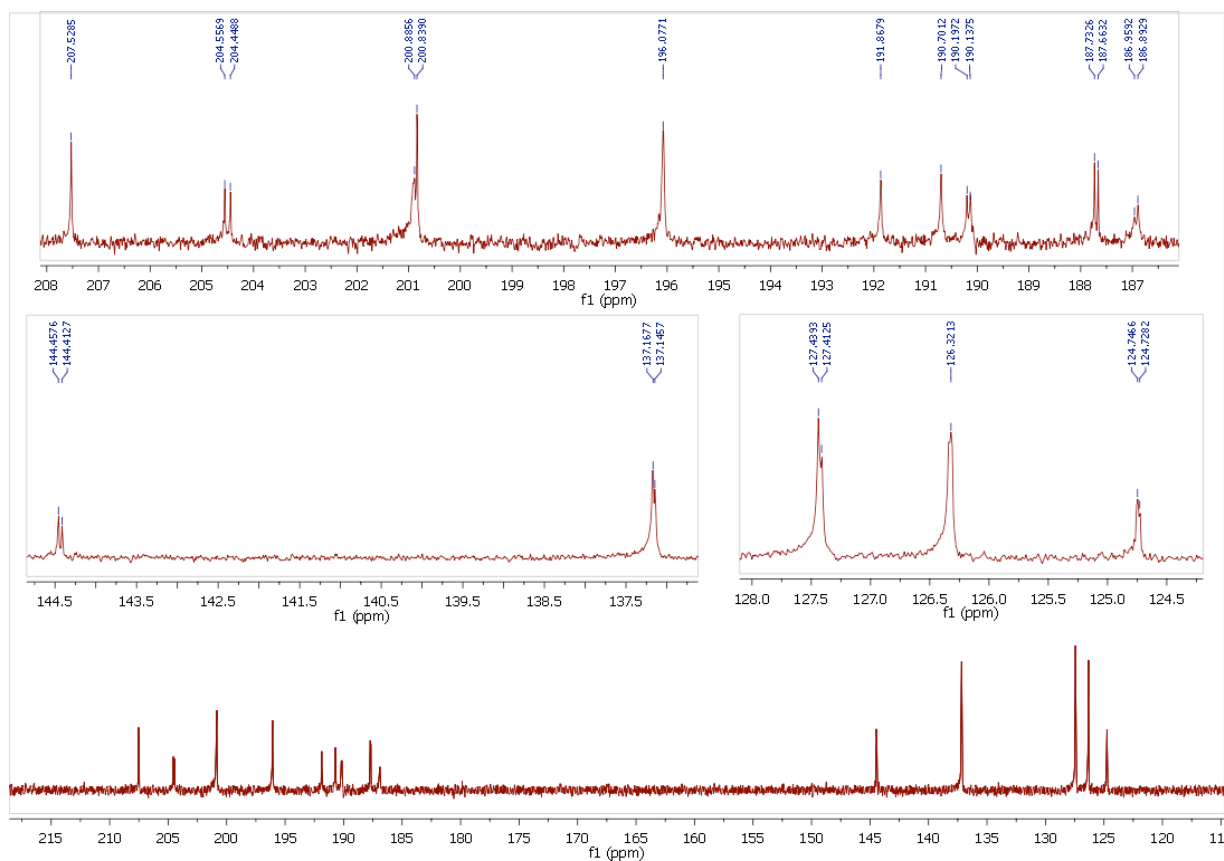

Fig. S2  $^{13}\text{C}\{^1\text{H}\}$  NMR spectrum ( $\text{CD}_2\text{Cl}_2$ , 293 K, 75.5 MHz) of **6a** + **6b**.
